# Supplementary material for: HOXC9 characterizes a suppressive tumor immune microenvironment and integration with multiple immune biomarkers predicts response to PD-1 blockade plus chemotherapy in lung adenocarcinoma
Source: publisher site journal article supplement (doi:10.18632/aging.205637), 2024-03-05
Supplement: Supplementary file [file aging-v16i5-205637-supplementary-material-SD2.pdf]

## SUPPLEMENTARY TABLE

**Supplementary Table 1. Baseline characteristics of the included patients.**

| <b>Characteristics</b>  | <b>Patients (n, %)</b> |
|-------------------------|------------------------|
| Age (years)             |                        |
| <65                     | 19 (61.3)              |
| ≥65                     | 12 (38.7)              |
| Gender                  |                        |
| Male                    | 22 (71.0)              |
| Female                  | 9 (29.0)               |
| ECOG performance status |                        |
| 0                       | 10 (32.3)              |
| 1                       | 21 (67.7)              |
| Smoking history         |                        |
| Non-smoker              | 11 (35.5)              |
| Smoker                  | 20 (64.5)              |
| PD-L1 TPS               |                        |
| <1%                     | 11 (35.5)              |
| <49%                    | 15 (48.4)              |
| ≥50%                    | 5 (16.1)               |
| Response to treatment   |                        |
| Complete response       | 1 (3.2)                |
| Partial response        | 18 (58.1)              |
| Stable disease          | 10 (32.3)              |
| Progression disease     | 3 (9.7)                |
